# Supplementary material
Source: ML conference proceedings conference paper supplement (https://proceedings.mlr.press/v80/hashimoto18a.html)
Supplement: Supplementary file 1 [file hashimoto18a-supp.zip]

## Instructions

We would like you to evaluate a text auto-completion system and your likelihood of using such a system. We will ask you to use a virtual keyboard with an auto-completion system to re-type 10 Tweets from Twitter, using the auto-complete to help you as you wish. You will have 1 hour to complete this task. *Note that this task works best with those with fast network speed. You can check whether your current network speed is fast enough at this link:*

<http://34.215.89.154:8080/static/latency.html> (<http://34.215.89.154:8080/static/latency.html>)

**DISCLAIMER: As we will be asking you to re-type real data from Twitter, the example texts in this system may contain offensive text and slang, despite automated filtering.**

After following the instructions below, please answer the questions in the survey:

1. Click on the "START TASK" link after the instructions.
2. Next to the "Please type this" entry is the text you have to replicate using the keyboard below. Start by clicking the first letter of the text on the keyboard.
3. If there exists any auto-complete suggestions, they appear as a drop down menu. Use them in the way that is most helpful for you.
4. If you enter a wrong key, the mismatch will be displayed next to the "Difference" entry. Use this entry to guide you to complete replicating the text.
5. Once you have successfully replicated, the accept button will turn green. Click to receive the next tweet.
6. Repeat until you have successfully replicated 10 tweets. Then, cancel the window and fill out the survey questions below.

We will manually inspect every answer before accepting your work, and will be logging your entries on the web form to verify you correctly replicated 10 tweets. **Incomplete survey answers will not be approved.**

In addition, completion of the task will result in a unique code we ask you to enter at the end of this survey - no task will be approved without a correctly provided code. This task is expected to take 10 minutes to complete, but you will be allotted an hour.

**INTERFACE LINK:** If the link above is not shown there is an error with Javascript on your computer. To perform this HIT, you must have Javascript and cookies enabled on your browser.

In the following survey, please provide feedback on the suggestions and usefulness of the autocomplete system itself – NOT the interface. Any feedback regarding the interface can be states at the end.

**1. Please describe good aspects of the autocomplete word suggestions:**

**2. On a scale of 1 (very unsatisfied) to 5 (extremely satisfied), how satisfied were you with the autocomplete suggestions?**

- ☐ 1 - very unsatisfied, did not find autocomplete system helpful
- ☐ 2
- ☐ 3
- ☐ 4
- ☐ 5 extremely satisfied, found autocomplete system helpful with task

**3. What were some drawbacks you experienced with the autocomplete word suggestions?**

**4. On a scale of 1 (not frustrated) to 5 (extremely frustrated), how frustrated were you with the autocomplete suggestions?**

- ☐ 1 - not frustrated at all
- ☐ 2
- ☐ 3
- ☐ 4
- ☐ 5 - extremely frustrated

**5. Would you use the suggestions from this autocomplete system to help with your own writing task?**

- ☐ Yes
- ☐ No

**6. On a scale of 1 (very unhappy) to 5 (very happy), how happy were you with this hit?**

- ☐ 1 - very unhappy
- ☐ 2
- ☐ 3
- ☐ 4
- ☐ 5 - very happy

**7. Please provide feedback on the interface for this task:**

**8. Please provide your unique code given at the end of the task:**
